# Supplementary material for: Single-cell genomics identifies distinct B1 cell developmental pathways and reveals aging-related changes in the B-cell receptor repertoire
Source: PubMed Central journal article supplement (PMC9080186; doi:10.1186/s13578-022-00795-6), 2022-05-07

Figure S1

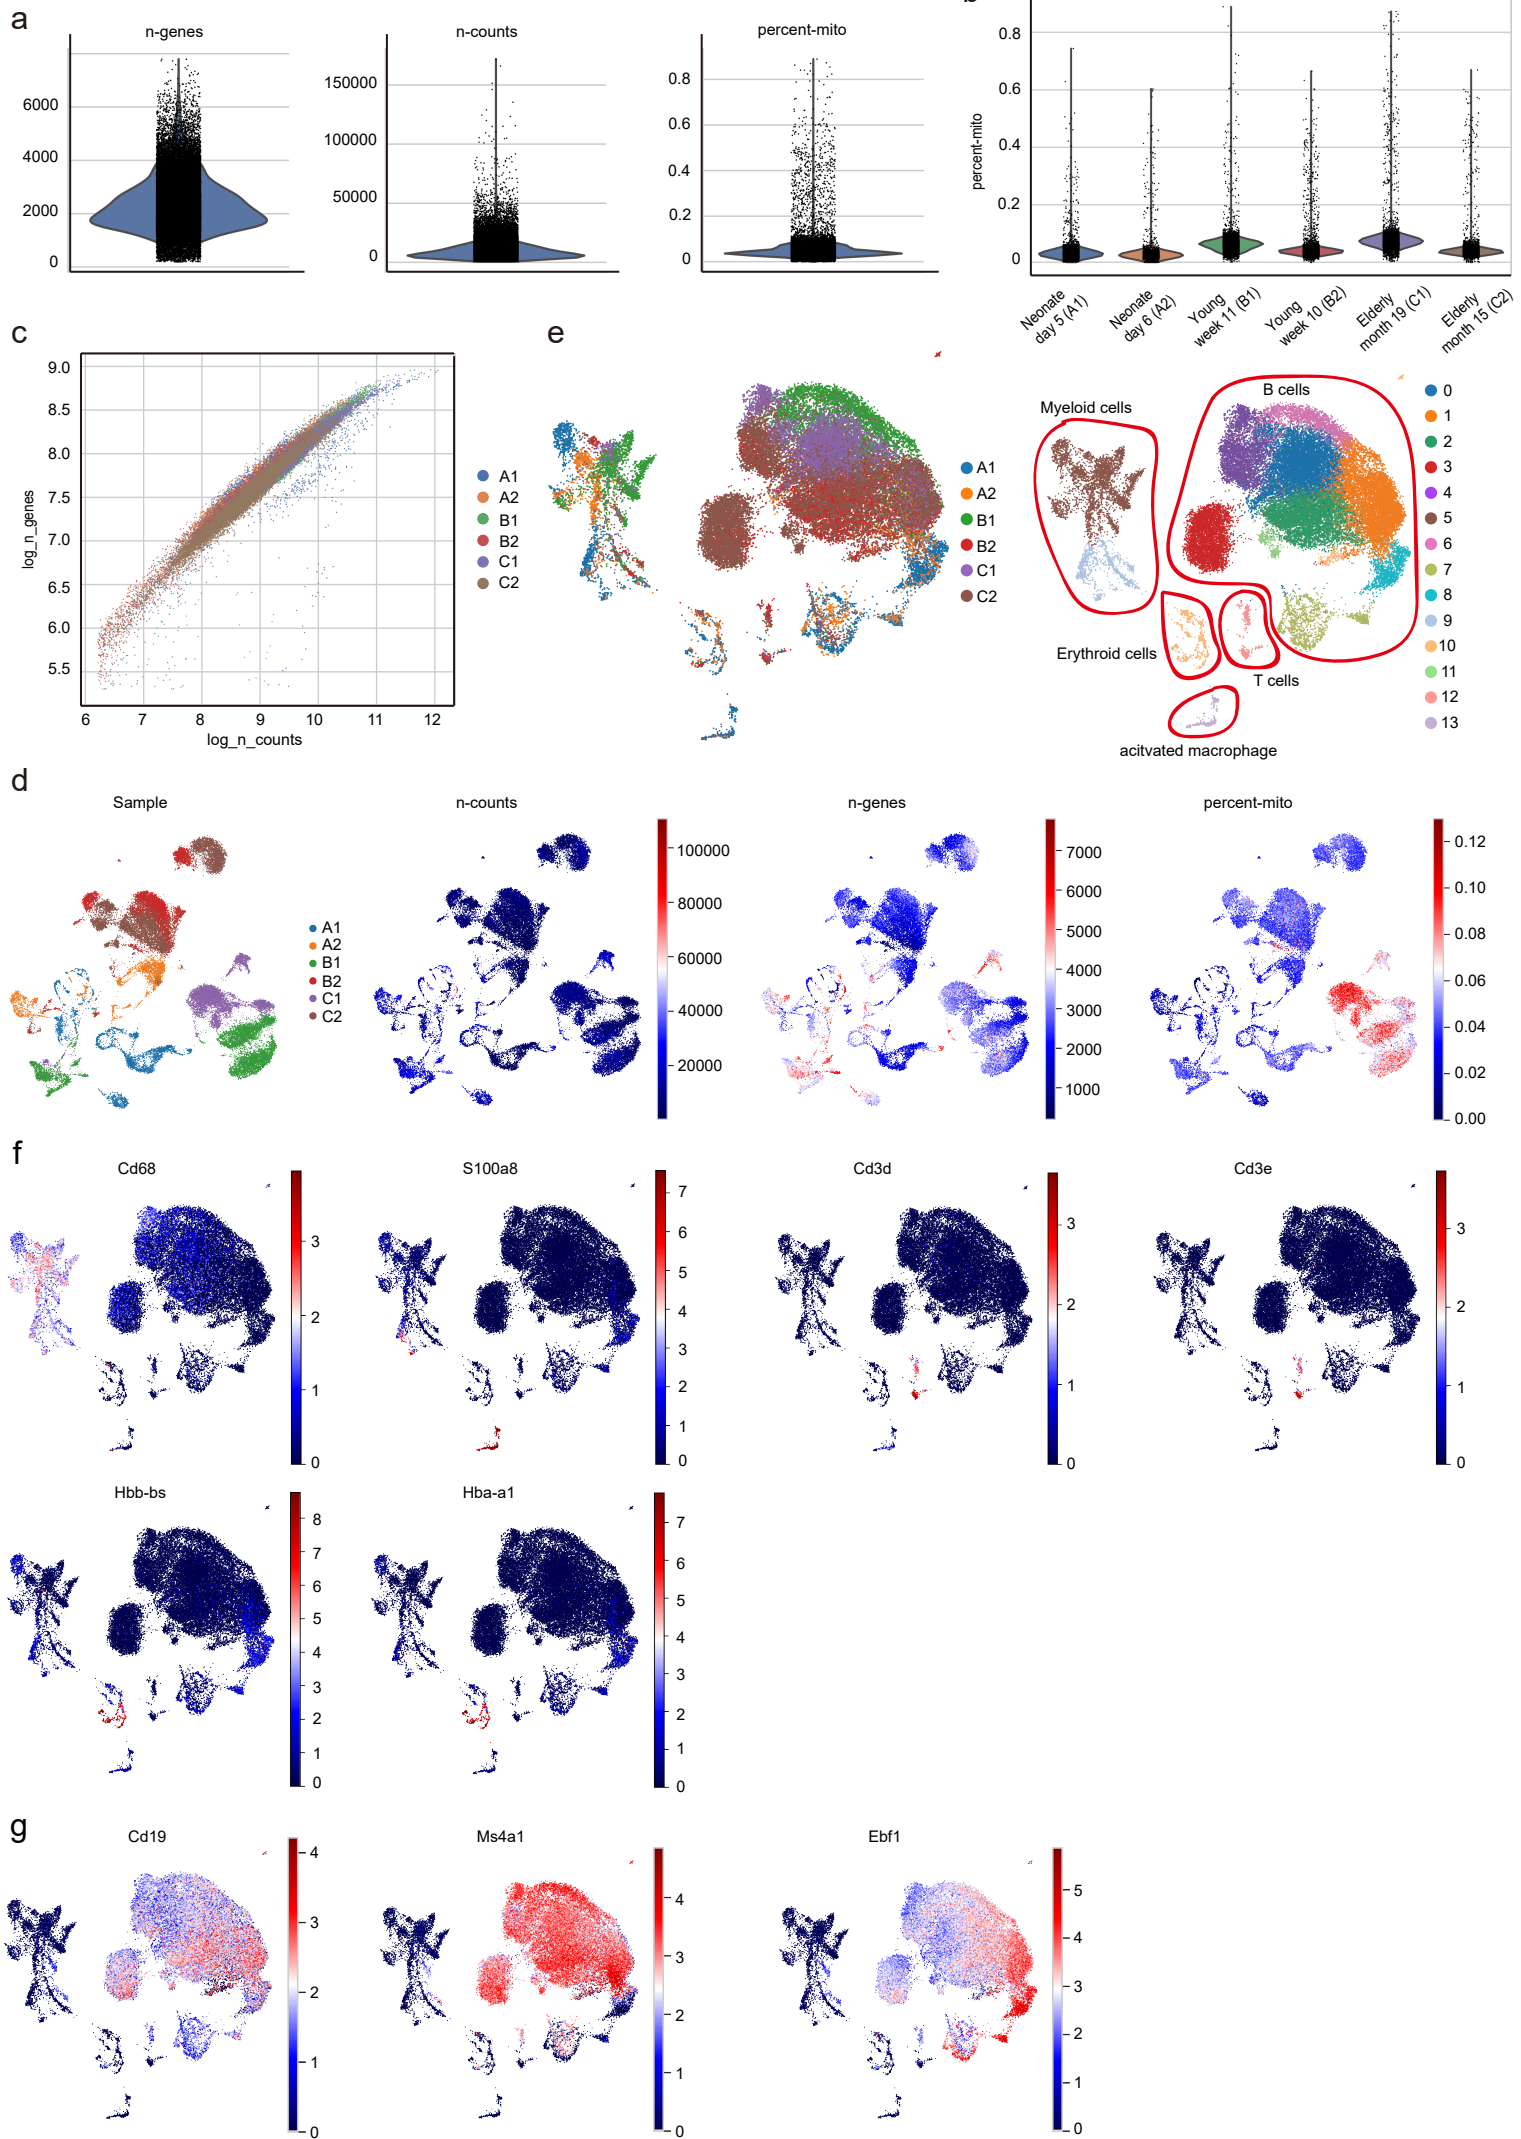

Figure S2

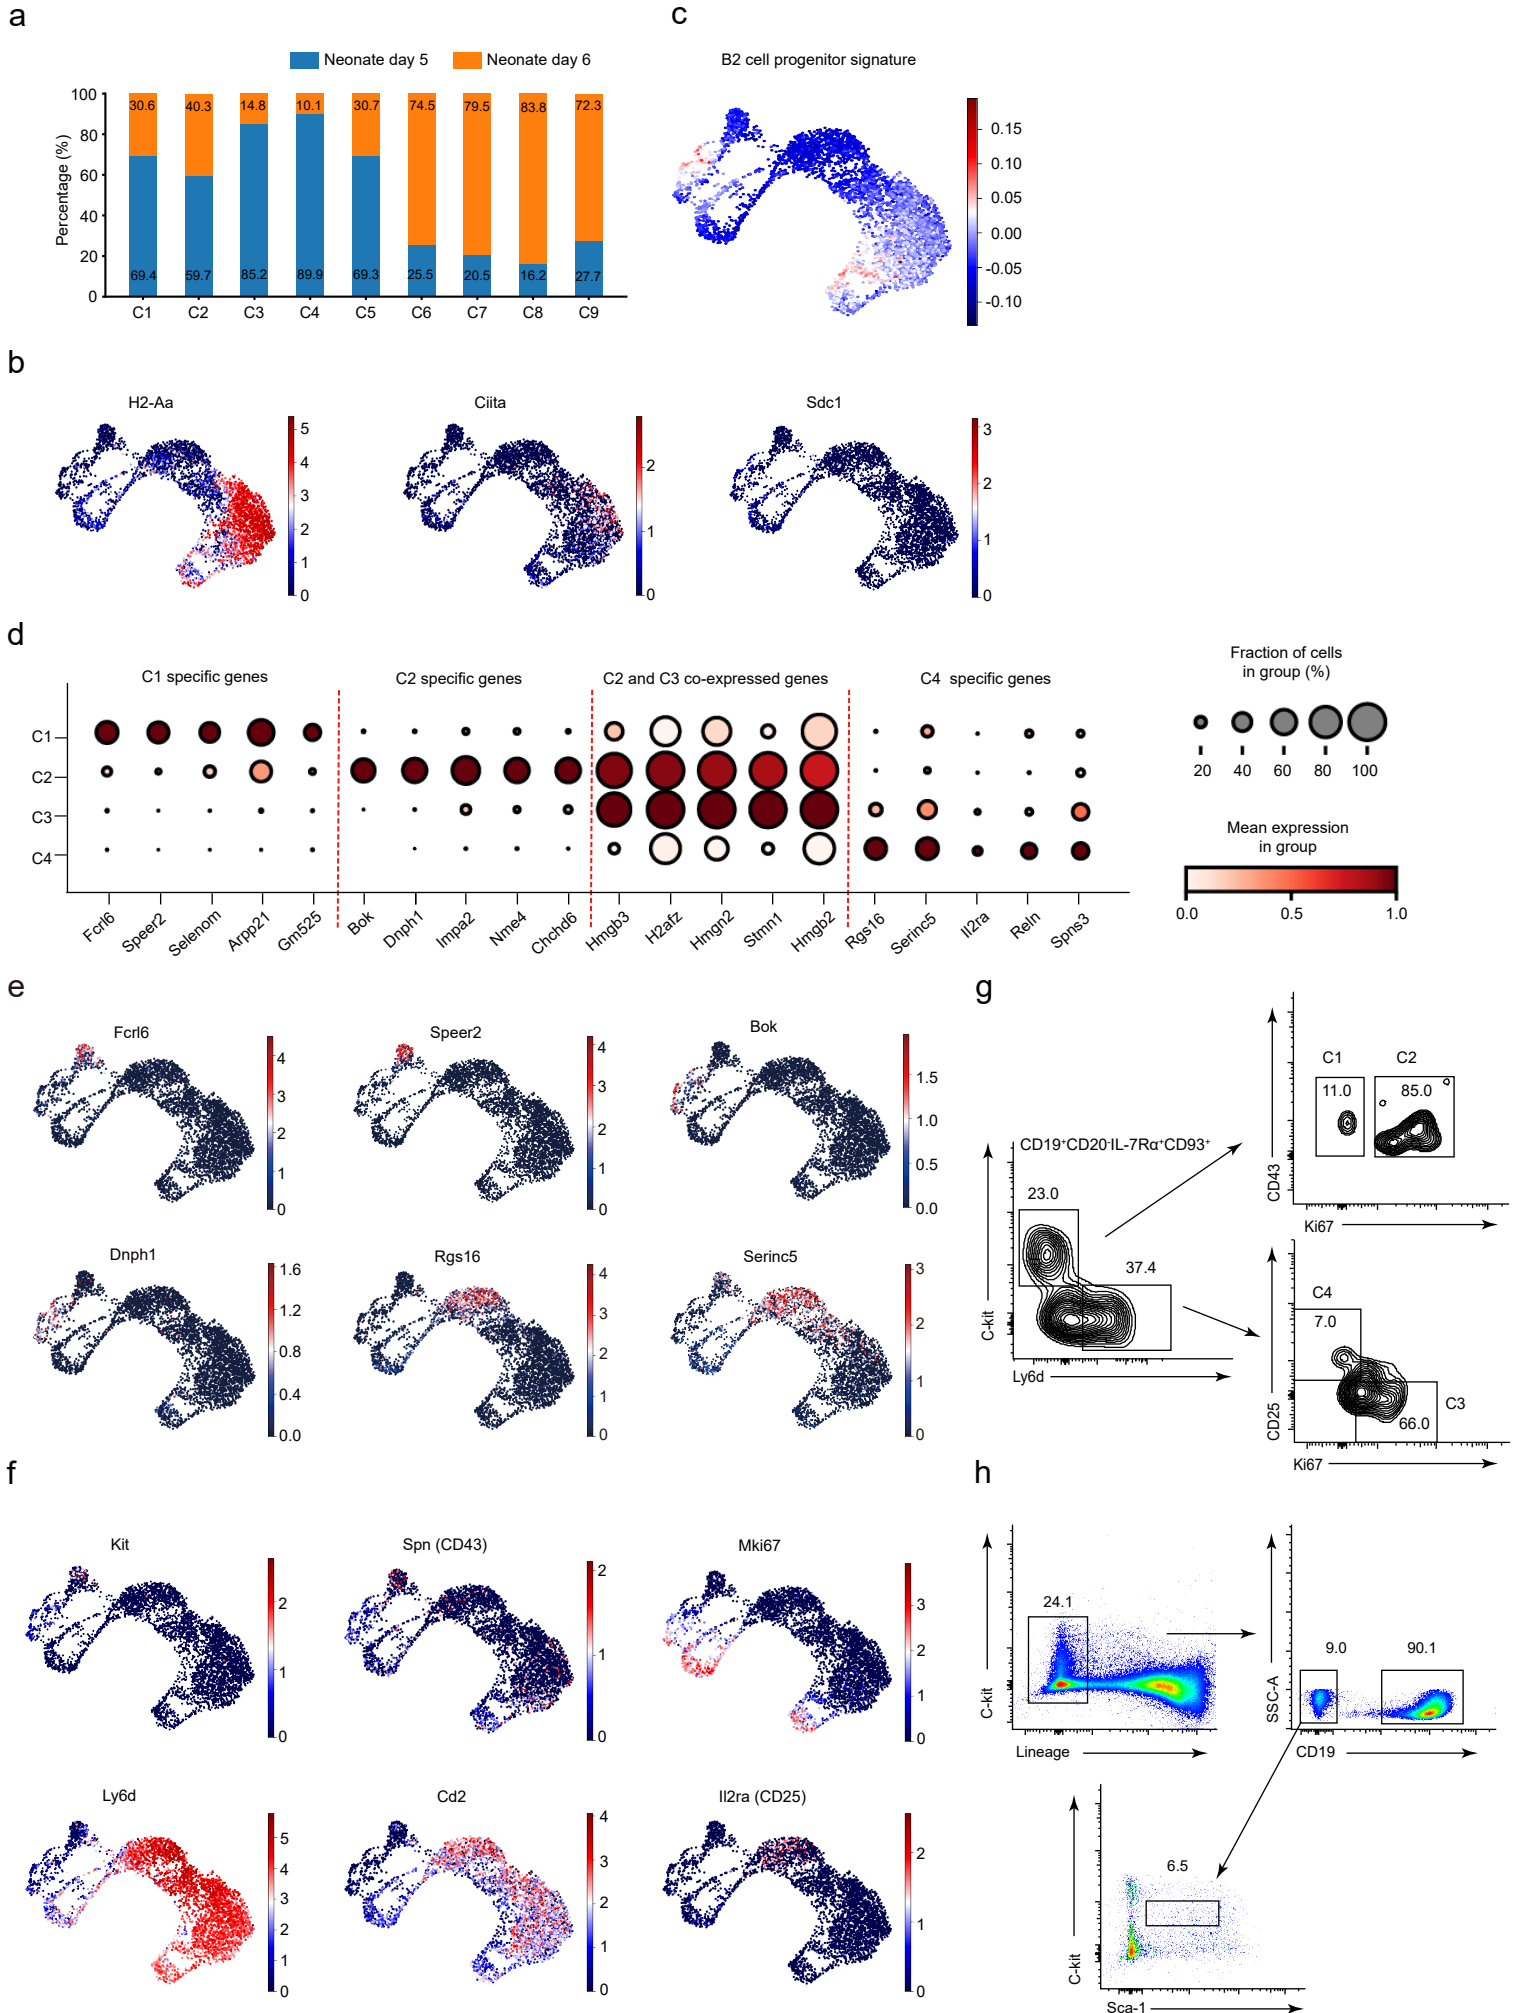

Figure S3

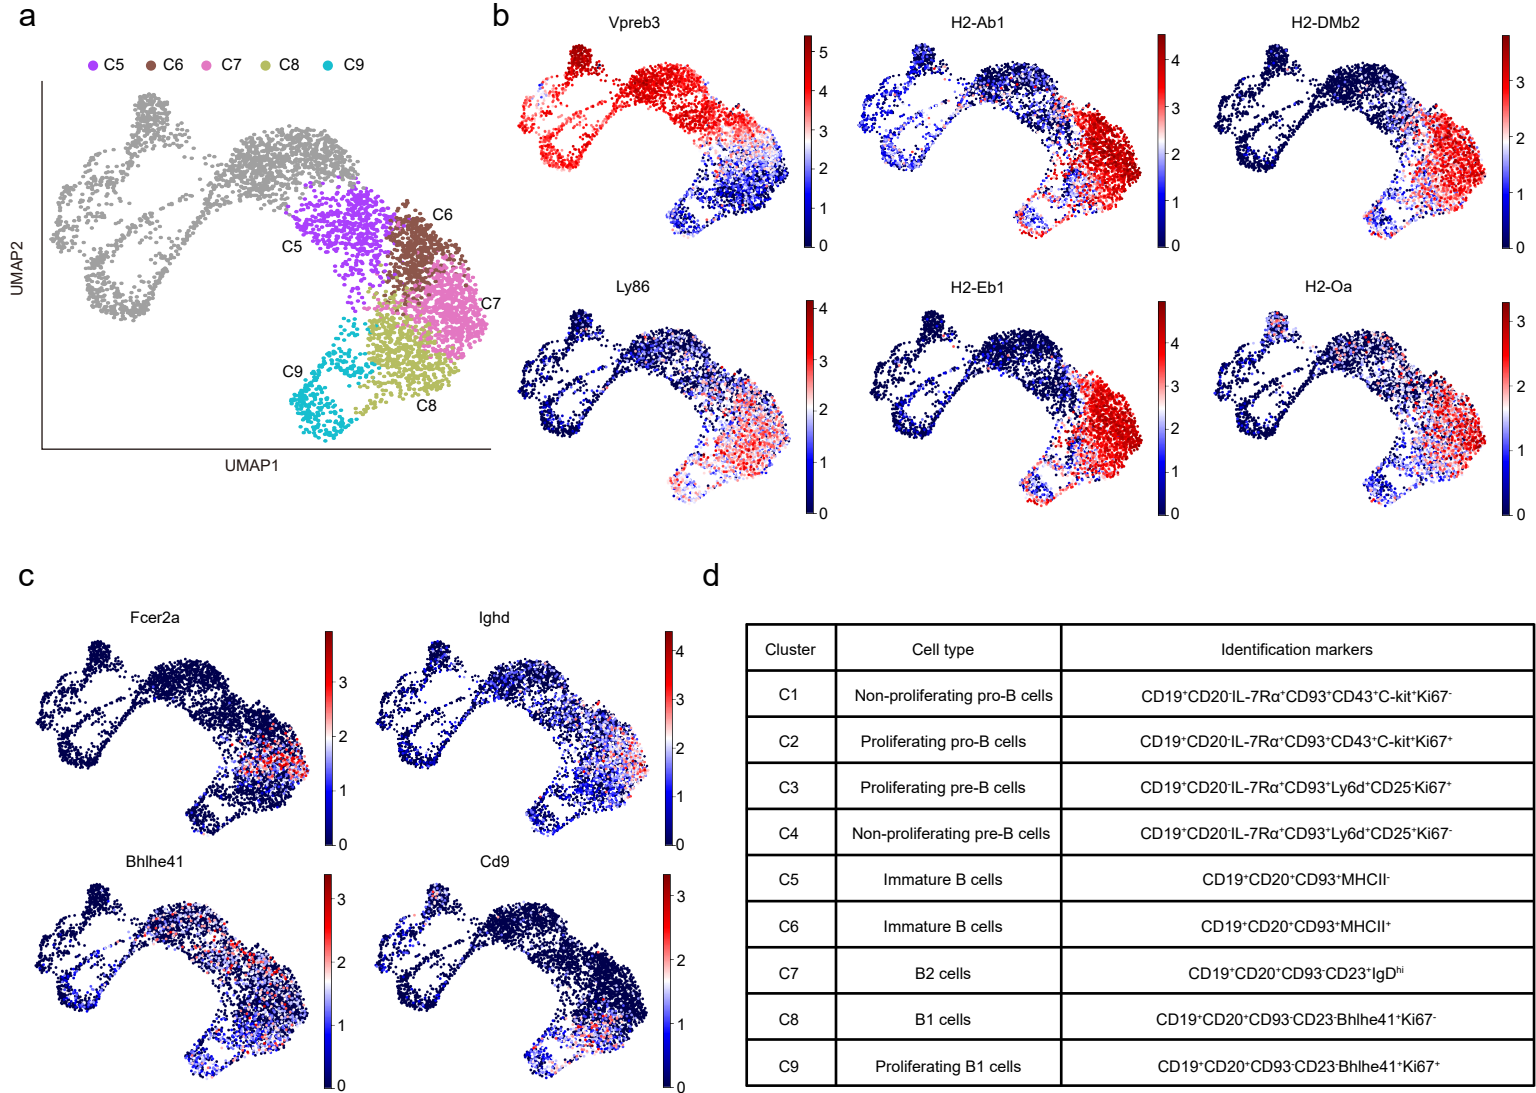

Figure S4

a The proportion of B1-C5 cluster in B1 cells in each mouse sample

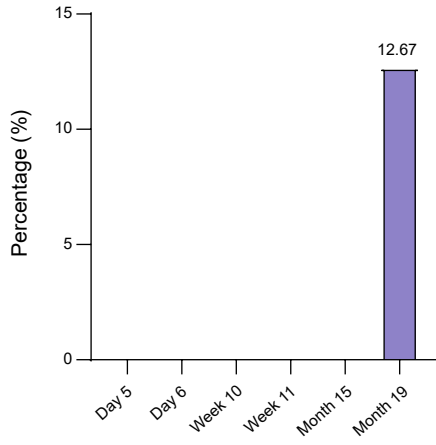

b

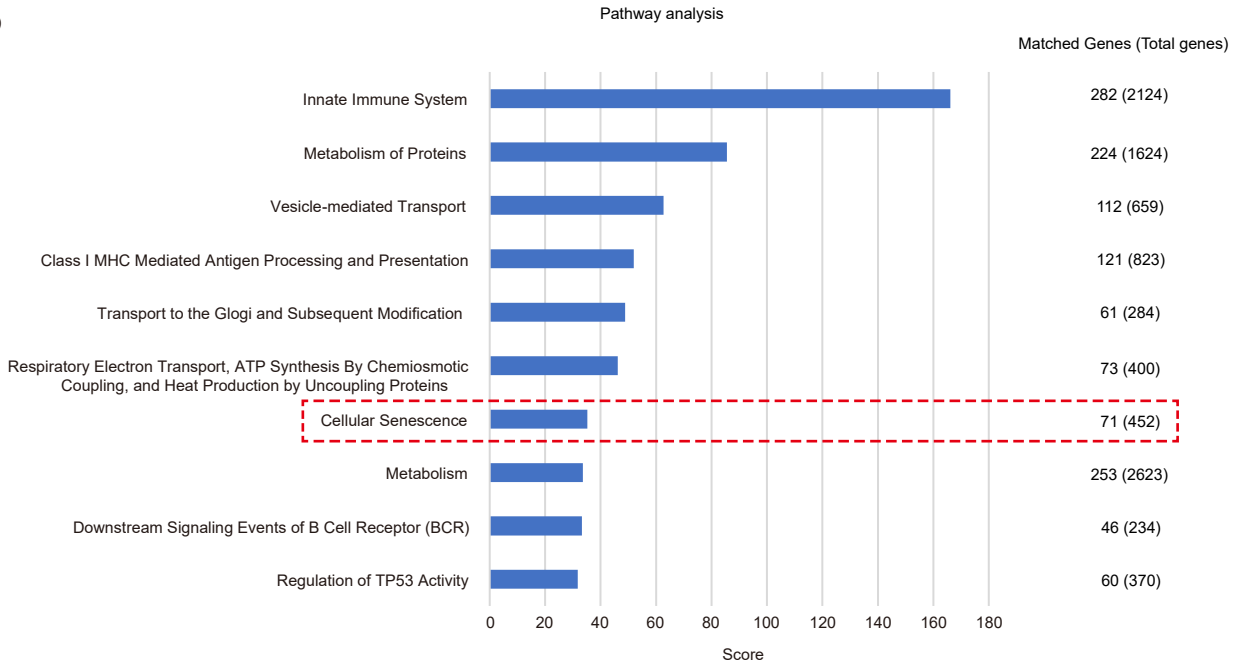

c

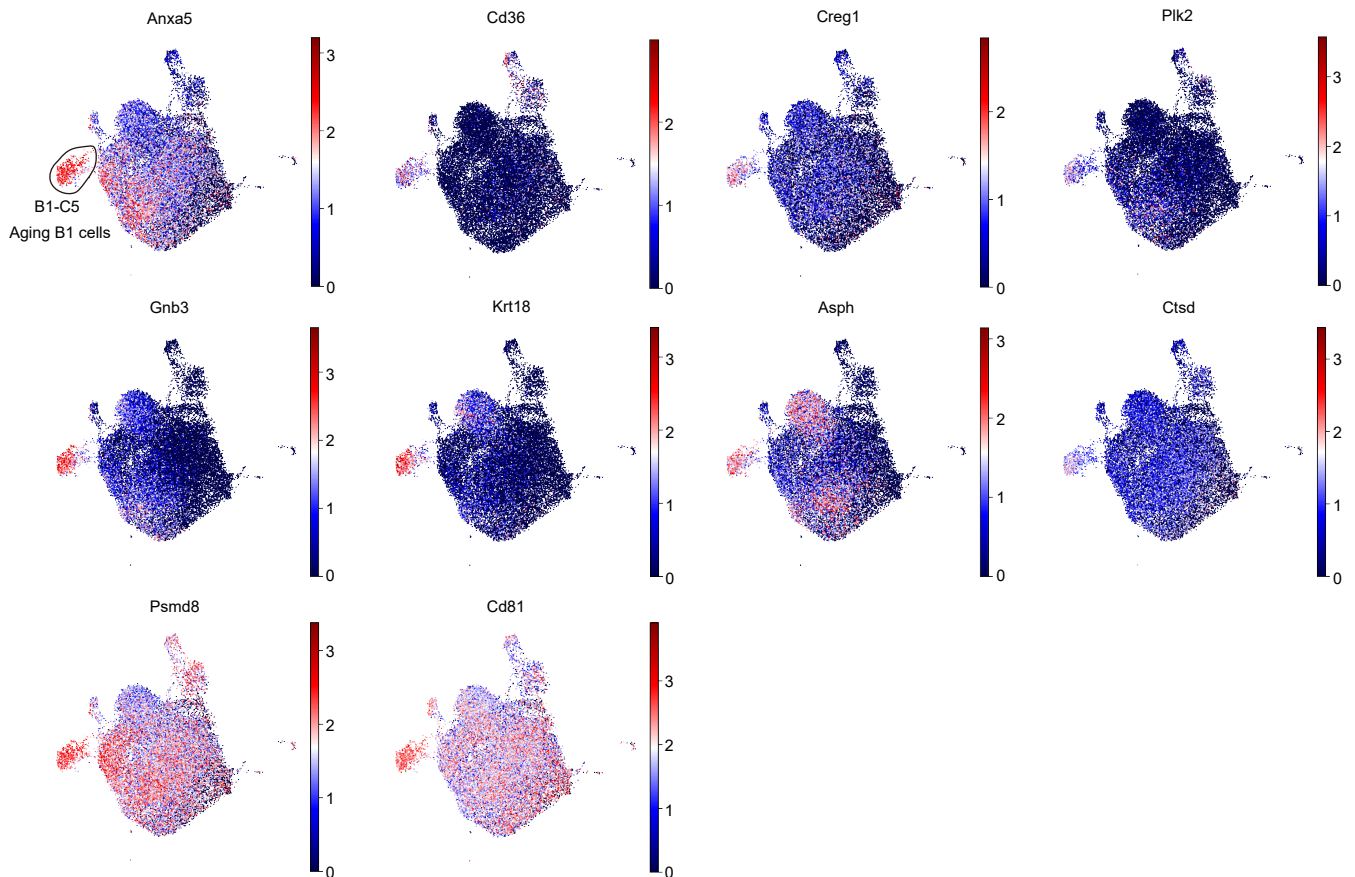

Figure S5

a

| Cell type | Mouse age | Ighv  | Igkv  |
|-----------|-----------|-------|-------|
| B1 cells  | day 6     | 813   | 854   |
|           | week 10   | 6,640 | 7,215 |
|           | month 15  | 7,193 | 8,234 |
| B2 cells  | day 6     | 686   | 719   |
|           | week 10   | 1,073 | 1,161 |
|           | month 15  | 925   | 1,064 |

b

The proportion of anti-PtC cells (Ighv12-3/Igkv4-91 and Ighv11-2/Igkv14-126 pairings) in the total B1 cells

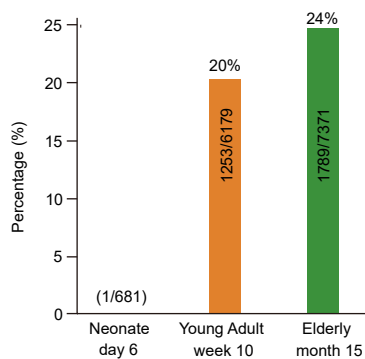

c

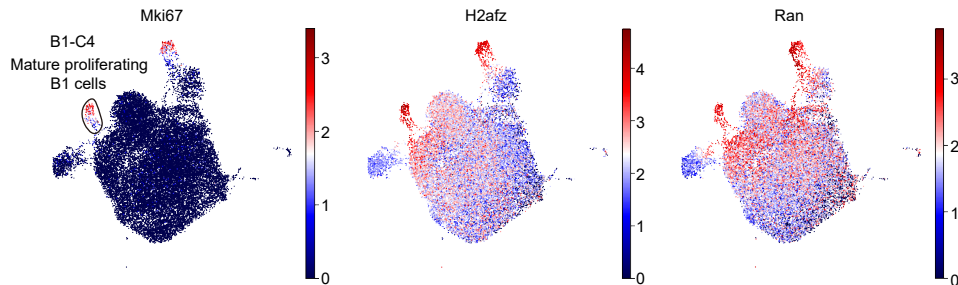

d

The proportion of anti-PtC cells in mature proliferating B1 subset

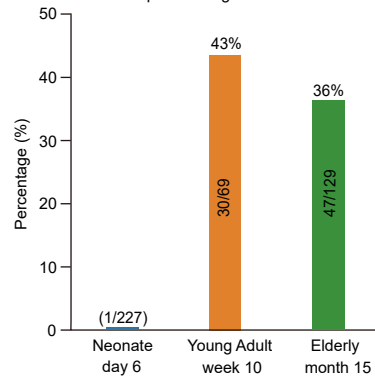

Supplement: 13578_2022_795_MOESM1_ESM.pdf [file 13578_2022_795_MOESM1_ESM.pdf]
